# Supplementary material for: Glasgow Coma Scale and Outcomes after Structural Traumatic Head Injury in Early Childhood
Source: PubMed Central journal article supplement (PMC3846816; doi:10.1371/journal.pone.0082245), 2013-12-02
Supplement: pone.0082245.s001.pdf [file pone.0082245.s001.pdf]

**Table S1.** Summary of Abbreviated Injury Scores for the head region (AIS-HR), adapted from: Association for the Advancement of Automotive Medicine (2001) The Abbreviated Injury Scale, 1990 Revision, Update 98. Barrington, IL: Association for the Advancement of Automotive Medicine.

| <b>Radiological Diagnosis</b>                                                                                                                        | <b>AIS-HR</b>      |
|------------------------------------------------------------------------------------------------------------------------------------------------------|--------------------|
| <b>Skull fracture</b><br>Vault fracture (simple)<br>Vault fracture (complex or depressed)<br>Basilar fracture (simple)<br>Basilar fracture (complex) | 2<br>3-4<br>3<br>4 |
| <b>Cerebral contusion</b><br>Small (<30 cc)<br>Large (30-50 cc)<br>Extensive (>50 cc)                                                                | 3<br>4<br>5        |
| <b>Subdural haematoma</b><br>Small (<25cc or 1cm thick)<br>Large (>25cc or 1cm thick) or bilateral                                                   | 4<br>5             |
| <b>Extradural haematoma</b><br>Small (<25 cc or 1 cm thick)<br>Large (>25cc or 1 cm) or bilateral                                                    | 4<br>5             |
